# Supplementary material
Source: HighWire-hosted journal article supplement (https://erj.ersjournals.com/content/55/5/1901126)
Supplement: inline-supplementary-material-1 [file inline-supplementary-material-1.pdf]

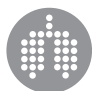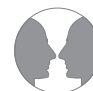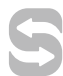

SHAREABLE PDF

# External heated humidification during non-invasive ventilation set up: results from a pilot cross-over clinical trial

Swapna Mandal<sup>1,2,3</sup>, Michelle Ramsay<sup>1,2,3</sup>, Eui-Sik Suh<sup>1,2,3</sup>, Rachel Harding<sup>1,2,3</sup>, April Thompson<sup>1,2,3</sup>, Abdel Douiri<sup>4</sup>, John Moxham<sup>2</sup>, Patrick Brian Murphy<sup>1,2,3</sup> and Nicholas Hart<sup>1,2,3</sup> 

**Affiliations:** <sup>1</sup>Lane Fox Clinical Respiratory Physiology Research Centre, St Thomas' Hospital, King's Health Partners, London, UK. <sup>2</sup>King's College London, School of Life Sciences, Centre for Human and Applied Physiological, London, UK. <sup>3</sup>Lane Fox Respiratory Service, Guy's and St Thomas' NHS Foundation Trust, London, UK. <sup>4</sup>School of Population Health and Environmental Sciences, King's College London, London, UK.

**Correspondence:** Nicholas Hart, Lane Fox Respiratory Service, Guy's and St Thomas' NHS Trust, Westminster Bridge Road, London, SE1 7EH, UK. E-mail: [nicholas.hart@gstt.nhs.uk](mailto:nicholas.hart@gstt.nhs.uk)

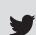

@ERSpublications

**Short-term heated humidification has limited effect on physiological and clinical outcomes during non-invasive ventilation set up** <http://bit.ly/31cFfGt>

**Cite this article as:** Mandal S, Ramsay M, Suh E-S, *et al.* External heated humidification during non-invasive ventilation set up: results from a pilot cross-over clinical trial. *Eur Respir J* 2020; 55: 1901126 [<https://doi.org/10.1183/13993003.01126-2019>].

This single-page version can be shared freely online.

## *To the Editor:*

Patient comfort is important in ensuring adherence to domiciliary non-invasive ventilation (NIV). Oronasal dryness is often reported with NIV use [1], but the use of heated humidification in clinical practice is not uniform [2]. As there are limited data to currently guide clinical practice, we investigated the effect of external heated humidification on neural respiratory drive (NRD), patient-ventilator asynchrony (PVA), patient-reported outcomes, ventilator performance and adherence in a pilot randomised crossover trial in patients with chronic respiratory failure during NIV set up.
